# Supplementary material for: Ag2S quantum dot-based magnetic resonance/fluorescence dual-mode imaging nanoprobes for tumor diagnosis
Source: Royal Society of Chemistry journal article supplement (doi:10.1039/d4bm01014k), 2024-01-01
Supplement: d4bm01014k1.pdf [file d4bm01014k1.pdf]

Electronic Supplementary Information

## **Ag<sub>2</sub>S Quantum Dot-based Magnetic Resonance/Fluorescence Dual-Mode Imaging Nanoprobes for Tumor Diagnosis**

Jia-Hua Zou<sup>‡,a,b</sup>, Li-Li Chen<sup>‡,a</sup>, Yong-Guo Hu<sup>a</sup>, Dong Zhou<sup>b</sup>, Yong Li<sup>a</sup>, Bin Zhang<sup>a</sup>, Xin-Yue Xu<sup>a</sup>, Bo Liu<sup>a</sup>, Jin-Xuan Fan<sup>a,\*</sup>, and Yuan-Di Zhao<sup>a,c,\*</sup>

---

<sup>a</sup> Britton Chance Center for Biomedical Photonics at Wuhan National Laboratory for Optoelectronics - Hubei Bioinformatics & Molecular Imaging Key Laboratory, Department of Biomedical Engineering, College of Life Science and Technology, Huazhong University of Science and Technology, Wuhan 430074, Hubei, P. R. China.

<sup>b</sup> Department of Oncology, Huanggang Central Hospital of Yangtze University, No.126 Qi'an Road, Huangzhou District Huanggang City 438000, Hubei, China.

<sup>c</sup> NMPA Research Base of Regulatory Science for Medical Devices & Institute of Regulatory Science for Medical Devices, Huazhong University of Science and Technology, Wuhan 430074, Hubei, P. R. China.

<sup>‡</sup> These authors contributed equally to this work.

E-mail: jxfan@hust.edu.cn (J.X. Fan); zydi@mail.hust.edu.cn (Y.D. Zhao)

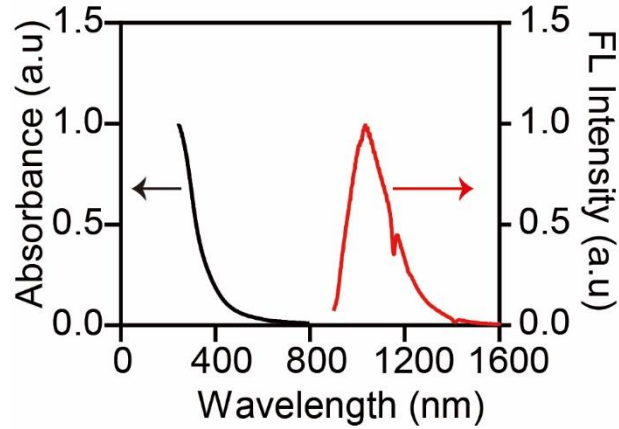

Fig. S1 The UV-Visible absorption spectrum of  $\text{Ag}_2\text{S}$  QDs and its fluorescence emission under 808 nm excitation.

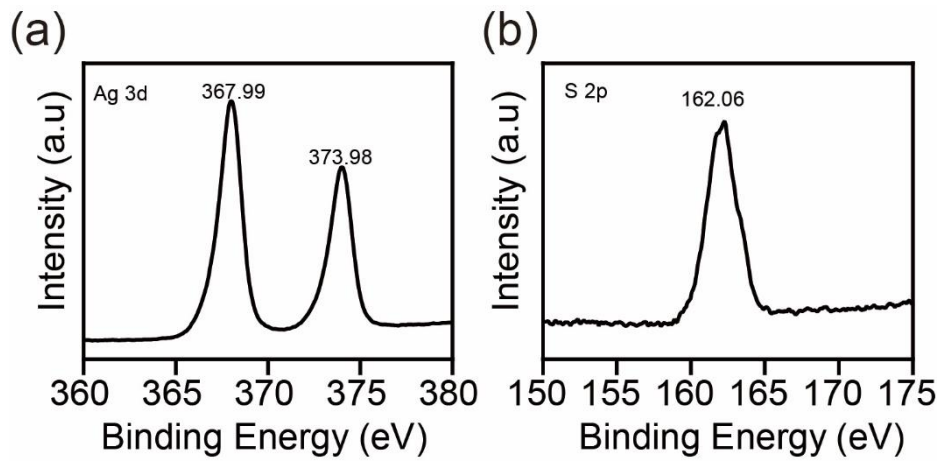

Fig. S2 The XPS spectrum of Ag 3d (a) and S 2p (b) for  $\text{Ag}_2\text{S}$  QDs.

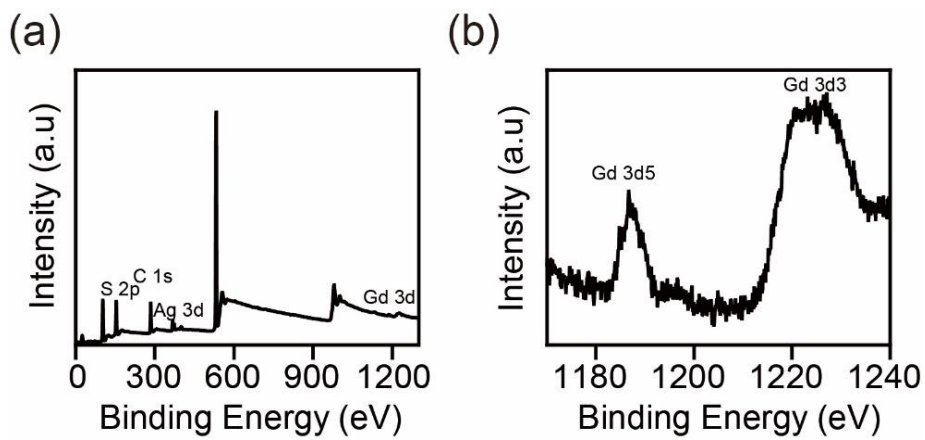

Fig. S3 The full XPS spectrum (a) and the XPS spectrum of Gd 3d for  $\text{Ag}_2\text{S}@M\text{-Gd}$ .

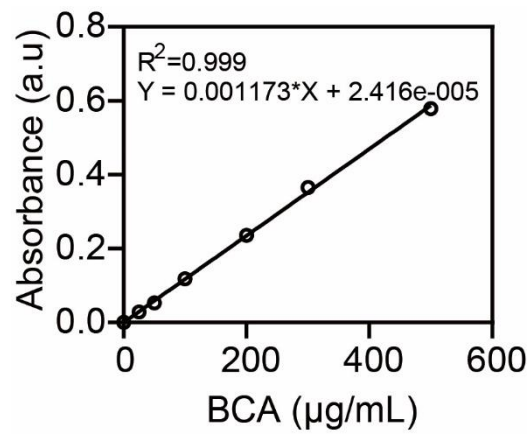

Fig. S4 The BCA standard curve for Ag<sub>2</sub>S@M-Gd-Ab.
